# Supplementary material for: Analysis of an Integrated Solar Combined Cycle with Recuperative Gas Turbine and Double Recuperative and Double Expansion Propane Cycle
Source: Entropy (Basel). 2020 Apr 21;22(4):476. doi: 10.3390/e22040476 (PMC7516956; doi:10.3390/e22040476)
Supplement: Supplementary file 1 [file entropy-22-00476-s001.csv]

Units:	T (K)	p (bar)	h (kJ/kg)	s (kJ/kg/K)	m (kg/s)	DNI (W/m2)
CCGT
Tamb	DNI	T_g1	p	h	s	T_g2	p	h	s	T_g3	p	h	s	T_g4	p	h	s	T_g5	p	h	T_g6	p	h	T_g7	p	h	T_g8	p	h	T_g9	p	h	T_g10	p	h	ma	mg	mf	T_a1	p	h	s	T_a2	p	h	s	T_a3	p	h
274.15	0	274.15	0.98	1.16	0.01	664.4	16.58	403.89	0.104	1500	15.75	1450.18	1.138	831.13	1.02	615.93	1.209	755.29	1.02	527.58	587.11	1.02	337.32	578.41	1.02	327.69	498.24	1.02	239.83	436.73	1.02	173.44	395.11	1.02	128.95	223.85	229.15	5.3	301.15	0.04	117.38	0.409	301.15	0.2	117.4	0.409	333	0.2	250.53
288.15	0	288.15	0.98	15.27	0.06	680.52	15.67	421.19	0.146	1500	14.88	1448.76	1.153	847.95	1.02	635.18	1.232	764.67	1.02	537.97	586.49	1.02	336.36	578.01	1.02	326.98	494.49	1.02	235.57	434.98	1.02	171.44	393.08	1.02	126.7	209.78	214.66	4.88	308.15	0.06	146.64	0.505	308.15	0.2	146.66	0.505	333	0.2	250.53
302.15	0	302.15	0.98	29.38	0.108	697.8	14.52	439.8	0.195	1500	13.79	1447.24	1.174	871.07	1.02	661.89	1.262	777.18	1.02	551.95	585.06	1.02	334.49	576.91	1.02	325.49	489.05	1.02	229.49	432.37	1.02	168.51	390.23	1.02	123.58	191.8	196.18	4.38	315.15	0.08	175.9	0.599	315.15	0.2	175.91	0.599	333	0.2	250.53
CCGT-R-DRDE
Tamb	DNI	T_g1	p	h	s	T_g2	p	h	s	T_g3	p	h	s	T_g4	p	h	s	T_g2R	p	h	s	T_G4R	p	h	s	T_g5	p	h	s	ma	mg	mf	T_f1	p	h	s	T_f2	p	h	s	T_f4	p	h	s	T_f5	p	h	s	T_f7
274.15	0	274.15	0.98	1.16	0.01	664.67	16.58	404.19	0.104	1500	15.58	1438.38	1.129	829.96	1.02	610.17	1.199	796.4	16.4	547.36	0.303	707.84	1.02	469.84	1.016	364.88	1.02	96.25	0.297	223.8	228.4	4.517	301.15	10.2683	273.307783	1.251519412	315.5	169.4063	315.9073385	1.286125726	348.25	169.4063	402.9934688	1.548575835	650.15	166.0182	1393.339078	3.584157293	537.18
288.15	0	288.15	0.98	15.27	0.06	680.79	15.67	421.48	0.146	1500	14.72	1436.93	1.144	846.82	1.02	629.3	1.222	813.67	15.5	566.44	0.344	723.46	1.02	487.14	1.04	368.52	1.02	100.01	0.308	209.8	213.9	4.135	308.15	12.1788	292.8367652	1.314314224	323.17	169.1451	335.7254626	1.348353592	358.24	169.1451	430.8855679	1.627698657	650.15	165.7622	1393.443396	3.584588171	543.21
302.15	0	302.15	0.98	29.38	0.108	698.06	14.51	440.07	0.195	1500	13.64	1435	1.164	869.93	1.02	655.61	1.252	836.44	14.36	591.7	0.396	741.26	1.02	506.82	1.067	373.97	1.02	105.65	0.323	191.8	195.5	3.662	315.15	14.3373	312.9601324	1.377403846	330.63	165.4888	355.1957094	1.410173258	368.92	165.4888	461.5779209	1.714373186	650.15	162.179	1394.919267	3.590688498	550.1
ISCC
Tamb	DNI	T_g1	p	h	s	T_g2	p	h	s	T_g3	p	h	s	T_g4	p	h	s	T_g5	p	h	T_g6	p	h	T_g7	p	h	T_g8	p	h	T_g9	p	h	T_g10	p	h	ma	mg	mf	T_s2	h	T_s1	h	m_HTF	T_a1	p	h	s	T_a2	p
274.15	0	274.15	0.98	1.16	0.01	664.4	16.58	403.89	0.104	1500	15.75	1450.18	1.138	831.13	1.02	615.93	1.209	749.83	1.02	521.27	569.09	1.02	317.39	562.34	1.02	309.95	486.81	1.02	227.43	435.41	1.02	172.03	390.32	1.02	123.86	223.85	229.15	5.3	663.15	792.53	586.5	603.69	85.34	301.15	0.04	117.38	0.409	301.15	0.2
288.15	0	288.15	0.98	15.27	0.06	680.52	15.67	421.19	0.146	1500	14.88	1448.76	1.153	847.95	1.02	635.18	1.232	758.85	1.02	531.24	568.43	1.02	316.41	561.95	1.02	309.27	483.67	1.02	223.86	433.9	1.02	170.28	388.4	1.02	121.73	209.78	214.66	4.88	663.15	792.53	586.5	603.69	85.34	308.15	0.06	146.64	0.505	308.15	0.2
302.15	0	302.15	0.98	29.38	0.108	697.8	14.52	439.8	0.195	1500	13.79	1447.24	1.174	871.07	1.02	661.89	1.262	770.85	1.02	544.62	566.73	1.02	314.26	560.58	1.02	307.5	477.88	1.02	217.42	431.32	1.02	167.38	385.61	1.02	118.67	191.8	196.18	4.38	663.15	792.53	586.5	603.69	85.34	315.15	0.08	175.9	0.599	315.15	0.2
274.15	850	274.15	0.98	1.16	0.01	666.07	16.58	405.68	0.106	1500	15.75	1450.03	1.138	831.1	1.02	615.84	1.209	737.12	0	506.6	581.68	0	331.28	575.67	0	324.63	481.44	0	221.6	438.83	0	175.68	389.48	0	122.95	223.85	229.15	5.3	663.82	794.27	587.29	605.56	85.35	301.15	0.04	117.38	0.409	301.15	0.2
288.15	849.495	288.15	0.98	15.27	0.06	680.52	15.67	421.19	0.146	1500	14.88	1448.76	1.153	847.95	1.02	635.18	1.232	745.05	1.02	515.33	580.84	1.02	330.11	575.18	1.02	323.86	477.08	1.02	216.73	437.05	1.02	173.66	387.34	1.02	120.6	209.78	214.66	4.88	663.21	792.68	586.61	603.96	85.35	308.15	0.06	146.64	0.505	308.15	0.2
302.15	846.143	302.15	0.98	29.38	0.108	697.8	14.52	439.8	0.195	1500	13.79	1447.24	1.174	871.07	1.02	661.89	1.262	755.51	1.02	526.91	579.29	1.02	328.12	574.13	1.02	322.42	471.15	1.02	210.16	434.61	1.02	170.91	384.5	1.02	117.49	191.8	196.18	4.38	661.79	789	585.26	600.79	85.34	315.15	0.08	175.9	0.599	315.15	0.2
ISCC-R-DRDE
Tamb	DNI	T_g1	p	h	s	T_g2	p	h	s	T_g3	p	h	s	T_g4	p	h	s	T_g2R	p	h	s	T_G4R	p	h	s	T_g5	p	h	s	ma	mg	mf	T_s2	h	T_s1	h	m_HTF	T_f1	p	h	s	T_f2	p	h	s	T_f4	p	h	s
274.15	0	274.15	0.98	1.16	0.01	664.67	16.58	404.19	0.104	1500	15.58	1438.38	1.129	829.96	1.02	610.17	1.199	796.4	16.4	547.36	0.303	707.84	1.02	469.84	1.016	362.09	1.02	93.31	0.289	223.8	228.4	4.517	663.15	792.53	563.15	549.66	0	301.15	10.2683	273.307783	1.251519412	311.15	117.3461	302.1482674	1.275104318	358.92	117.3461	434.9369472	1.671512815
288.15	0	288.15	0.98	15.27	0.06	680.79	15.67	421.48	0.146	1500	14.72	1436.93	1.144	846.82	1.02	629.3	1.222	813.67	15.5	566.44	0.344	723.46	1.02	487.14	1.04	368.98	1.02	100.49	0.309	209.8	213.9	4.135	663.15	792.53	563.15	549.66	0	308.15	12.1788	292.8367652	1.314314224	318.53	116.2933	321.4910649	1.337218795	368.81	116.2933	465.0970742	1.755091858
302.15	0	302.15	0.98	29.38	0.108	698.06	14.51	440.07	0.195	1500	13.64	1435	1.164	869.93	1.02	655.61	1.252	836.44	14.36	591.7	0.396	741.26	1.02	506.82	1.067	377.39	1.02	109.24	0.332	191.8	195.5	3.662	663.15	792.53	563.15	549.66	0	315.15	14.3373	312.9601324	1.377403846	325.82	113.71	340.9592707	1.399287917	379.34	113.71	498.8391926	1.846972103
274.15	850	274.15	0.98	1.16	0.01	666.08	16.58	405.7	0.106	1500	15.58	1438.36	1.129	829.95	1.02	610.16	1.199	796.67	16.4	547.66	0.304	708.88	1.02	471	1.018	339.93	1.02	70.01	0.223	223.8	228.4	4.515	663.15	792.53	524.73	463.88	46.77	301.15	10.2683	273.3449762	1.251689726	314.81	160.9482	313.7246541	1.28453164	330.06	160.9482	353.5726922	1.408119755
288.15	849.495	288.15	0.98	15.27	0.06	680.79	15.67	421.48	0.146	1500	14.72	1436.93	1.144	846.82	1.02	629.3	1.222	813.67	15.5	566.44	0.344	723.46	1.02	487.14	1.04	346.49	1.02	76.84	0.243	209.8	213.9	4.135	663.15	792.53	529.88	475.14	48.32	308.15	12.1788	292.8367652	1.314314224	321.83	153.4869	331.5268959	1.345065312	342.22	153.4869	386.2678612	1.510002268
302.15	846.143	302.15	0.98	29.38	0.108	698.06	14.51	440.07	0.195	1500	13.64	1435	1.164	869.93	1.02	655.61	1.252	836.44	14.36	591.7	0.396	741.26	1.02	506.82	1.067	354.42	1.02	85.08	0.266	191.8	195.5	3.662	663.15	792.53	534.58	485.51	49.68	315.15	14.3373	312.9601324	1.377403846	329.36	151.4149	351.3461538	1.407247823	353.37	151.4149	417.3873894	1.60077115
[truncated: 51 more columns]
